# Supplementary material
Source: Springer Nature journal article supplement (https://www.springermedizin.de/resource/supplementary/12970_2012_306_MOESM6_ESM.pdf/9594782)

# GI Disturbance (0-6)

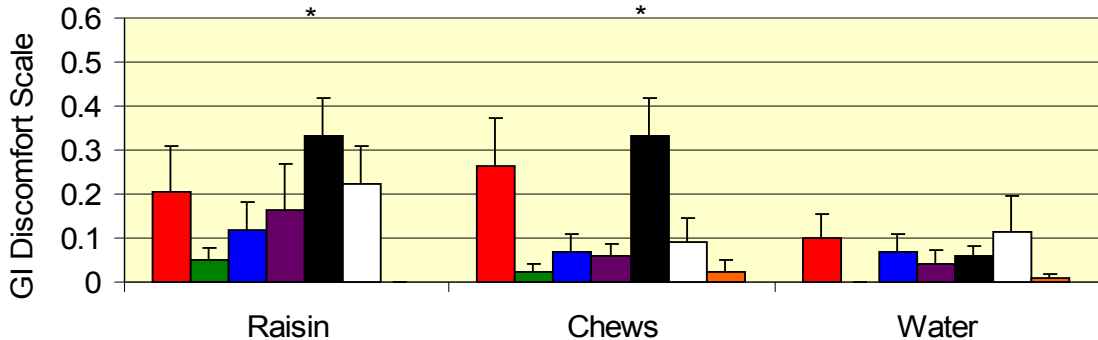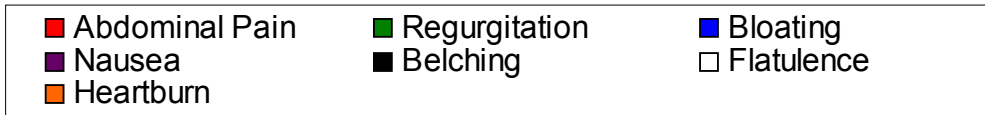

Supplement: MOESM6 [file 9594782]
